# Supplementary material for: Systematic mapping of global research on climate and health: a machine learning review
Source: PubMed Central journal article supplement (PMC8358978; doi:10.1016/s2542-5196(21)00179-0), 2021-07-14
Supplement: mmc1.pdf [file mmc1.pdf]

# THE LANCET

## Planetary Health

### Supplementary appendix

This appendix formed part of the original submission and has been peer reviewed. We post it as supplied by the authors.

Supplement to: Berrang-Ford L, Sietsma AJ, Callaghan M, et al. Systematic mapping of global research on climate and health: a machine learning review. *Lancet Planet Health* 2021; published online July 13. [https://doi.org/10.1016/S2542-5196\(21\)00179-0](https://doi.org/10.1016/S2542-5196(21)00179-0).

## APPENDIX 1 – SUPPLEMENTARY MATERIALS

### Table of Contents

|                                                                                                                              |   |
|------------------------------------------------------------------------------------------------------------------------------|---|
| Summary of search strings .....                                                                                              | 1 |
| Extended materials for machine learning methods .....                                                                        | 4 |
| List of topics from the topic model, and associated categorisations, as well as keywords<br>dominant within each topic ..... | 7 |

## APPENDIX I: SUPPLEMENTARY MATERIALS

### Summary of search strings.

Each of the strings is connected by a boolean 'OR'. The Scopus search string is given here; for Web of Science and Medline, the syntax is different, and some other minor changes were made, most notably removing left-truncated keywords. Search hits shown in the table were conducted on 9 April 2020. Note the following data search functions: \* = any subsequent letters; W/# = maximum number of words allowed between the term directly to the left and that directly to the right of the W/#; and ? = any letter or space to replace the "?".

| Theme                                                                                                         | Key concepts                                                                                                                                                                | String (Scopus)                                                                                                                                                                                                                                                                                                                                                                                                                                                                                                                                                                                                                               | Attributable Hits (scopus) |
|---------------------------------------------------------------------------------------------------------------|-----------------------------------------------------------------------------------------------------------------------------------------------------------------------------|-----------------------------------------------------------------------------------------------------------------------------------------------------------------------------------------------------------------------------------------------------------------------------------------------------------------------------------------------------------------------------------------------------------------------------------------------------------------------------------------------------------------------------------------------------------------------------------------------------------------------------------------------|----------------------------|
| <b>Climate change</b><br><br><i>(contains at least one of the following climate terms, from any category)</i> | General climate change terms                                                                                                                                                | (climat* OR "global warming" OR "greenhouse effect*")                                                                                                                                                                                                                                                                                                                                                                                                                                                                                                                                                                                         | 35,052                     |
|                                                                                                               | Greenhouse gasses, including short-lived greenhouse gasses, and particulate matter when linked to emission or mitigation. Some astronomy results are excluded/filtered out. | ((("carbon dioxide" OR co2 OR methane OR ch4 OR "nitrous oxide" OR n2o OR "nitric oxide" OR "nitrogen dioxide" OR nox OR *chlorofluorocarbon* OR *cfc* OR refrigerant OR hydrofluorocarbon* OR hfc* OR *chlorocarbon* OR "carbon tetrachloride" OR ccl4 OR halogen* OR ozone OR o3 OR ammonia OR nh3 OR "carbon monoxide" OR co OR "volatile organic compounds" OR nmvoc OR "hydroxyl radical" OR "oh" OR "pm2.5" OR aerosol OR "black carbon" OR "organic carbon" OR "sulphur dioxide" OR "oxidized sulphur" OR "so2" OR "sox" OR "sulphuric acid" OR so4* ) W/2 (emit* OR emission OR releas* OR mitigat*) AND NOT(star OR "solar system")) | 7,871                      |
|                                                                                                               | Climate variability indicators/climate indices                                                                                                                              | (temperature* OR precipitat* OR rainfall OR "heat ind*" OR "extreme-heat event*" OR "heat-wave" OR "extreme-cold*" OR "cold ind*" OR humidity OR drought* OR hydroclim* OR monsoon OR "el niño" OR enso OR SOI OR "sea surface temperature*" OR sst)                                                                                                                                                                                                                                                                                                                                                                                          | 199,558                    |

|                                                                                                                        |                                                                                                                                            |                                                                                                                                                                                                                                                                            |        |
|------------------------------------------------------------------------------------------------------------------------|--------------------------------------------------------------------------------------------------------------------------------------------|----------------------------------------------------------------------------------------------------------------------------------------------------------------------------------------------------------------------------------------------------------------------------|--------|
|                                                                                                                        | Complex climate indices, including extreme weather events, floods, wildfire, and coastal changes. Some paleo-climatic events are excluded. | (snowmelt* OR flood* OR storm* OR cyclone* OR hurricane* OR typhoon* OR "sea-level" OR wildfire* OR "wild-fire*" OR "forest-fire*" OR ( ( extreme W/1 event* ) AND NOT paleo* ) OR "coast* erosion" OR "coastal change*" OR ( disaster* W/1 ( risk OR manag* OR natural))) | 22,031 |
| <b>AND</b><br><br><b>Health</b><br><br><i>(contains at least one of the following health terms, from any category)</i> | General health terms                                                                                                                       | (health* OR well?being OR ill OR illness OR disease* OR syndrome* OR infect* OR medical*)                                                                                                                                                                                  | 49,773 |
|                                                                                                                        | General health outcomes                                                                                                                    | (mortality OR daly OR morbidity OR injur* OR death* OR hospital* OR {a&e} OR emergency OR emergencies OR doctor OR gp)                                                                                                                                                     | 33,571 |
|                                                                                                                        | Nutrition, including obesity and undernutrition                                                                                            | (obes* OR over?weight OR under?weight OR hunger OR stunting OR wasting OR undernourish* OR undernutrition OR anthropometr* OR malnutrition OR malnour* OR anemia OR anaemia OR "micronutrient*" OR "micro?nutrient*" OR diabet*)                                           | 2,239  |
|                                                                                                                        | Cardio-vascular terms. Some studies on Chemical Vapour Deposition (CVD) are excluded.                                                      | (hypertension OR "blood pressure" OR stroke OR *vascular OR (cvd AND NOT(vapour or vapor)) OR "heart disease" OR isch?emic OR cardio?vascular OR "heart attack*" OR coronary OR chd)                                                                                       | 6,047  |
|                                                                                                                        | Renal health terms                                                                                                                         | (ckd OR renal OR cancer OR kidney OR lithogenes*)                                                                                                                                                                                                                          | 4,934  |

|  |                                                                                        |                                                                                                                                                                                                                                                                                                           |        |
|--|----------------------------------------------------------------------------------------|-----------------------------------------------------------------------------------------------------------------------------------------------------------------------------------------------------------------------------------------------------------------------------------------------------------|--------|
|  | Effects of temperature extremes                                                        | ((heat W/2 (stress OR fatigue OR burn* OR stroke OR exhaustion OR cramp* ) ) OR skin OR fever* OR renal* OR rash* OR eczema* OR "thermal stress" OR hypertherm* OR hypotherm*))                                                                                                                           | 23,846 |
|  | Maternal health outcomes                                                               | (pre?term OR stillbirth OR birth?weight OR lbw OR maternal OR pregnan* OR gestation* OR *eclampsia OR sepsis OR oligohydramnios OR placenta* OR haemorrhage OR hemorrhage)                                                                                                                                | 2,041  |
|  | Vector-borne diseases                                                                  | (malaria OR dengue* OR mosquito* OR chikungunya OR leishmaniasis OR encephalit* OR vector-borne OR pathogen OR zoonos* OR zika OR "west nile" OR onchocerciasis OR filariasis OR lyme OR tick?borne)                                                                                                      | 2,257  |
|  | Bacterial, parasitic and viral infections, including waterborne and foodborne diseases | (waterborne OR "water borne" OR diarrhoea* OR diarrhe*I OR gastro* OR enteric OR *bacteria* OR viral OR *virus* OR parasit* OR vibrio* OR cholera OR protozoa* OR salmonella OR giardia OR shigella OR campylobacter OR food?borne OR aflatoxin OR poison* OR ciguatera OR((snake* OR adder*) W/2 bite*)) | 46,064 |
|  | Respiratory outcomes                                                                   | (respiratory OR allerg* OR lung* OR asthma* OR bronchi* OR pulmonary* OR copd OR rhinitis OR wheez*)                                                                                                                                                                                                      | 3,432  |
|  | Mental health outcomes                                                                 | (mental OR depress* OR *stress* OR anxi* OR ptsd OR psycho* OR *trauma* OR suicide* OR solastalgi*)                                                                                                                                                                                                       | 12,616 |
|  | Health systems                                                                         | [no additional terms needed]                                                                                                                                                                                                                                                                              |        |

## Extended materials for machine learning methods

### 1 Supervised learning

Supervised learning was used to create a dataset of relevant documents. The final code for this can be found at <https://doi.org/10.5281/zenodo.4322697>. In short, we tried four different machine learning algorithms, all through implementations of the Scikit-learn toolkit. These were a Neural Net, Naïve Bayes, Random Forrest and Support Vector Machine (SVM). We chose initial hyper-parameters based on the advised starting value of the Scikit documentation and prior experience with similar task. We then used 10 k-fold cross validation to arrive at the scores of the figure below.

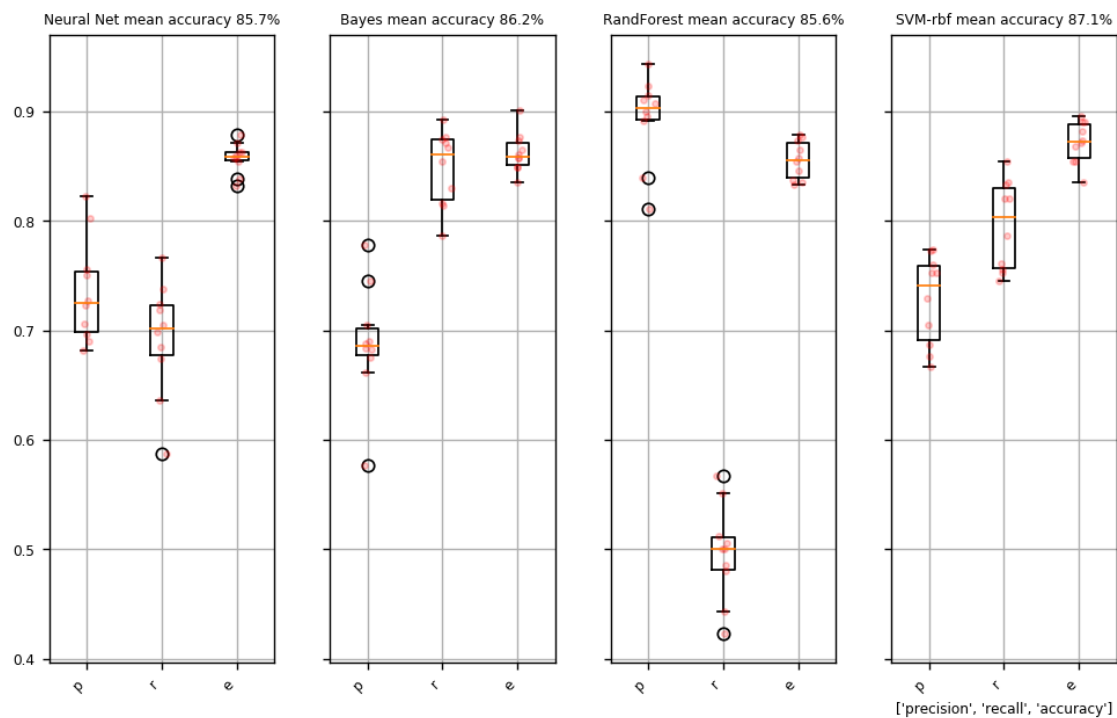

As can be seen, SVM gives promising results here, with the highest accuracy and a good spread of precision and recall, without any real outliers. Based on this, we ran a few extra test runs with different kernels (linear and RBF) as well as class weights (balanced and unbalanced). The RBF kernel and balanced weights proved to give the best results. More extensive parameter tuning was not done at this stage. SVM was also used to predict classes in a one-vs-rest set-up.

Since we used the algorithm to provide relevance scores (rather than a Boolean in/out), we could then investigate what threshold for inclusion would be appropriate. Since our aim was to be fairly comprehensive, it seemed prudent to lower the threshold for inclusion somewhat, gaining recall at

the expense of some precision. From the precision/recall plot (below), this appeared a plausible strategy.

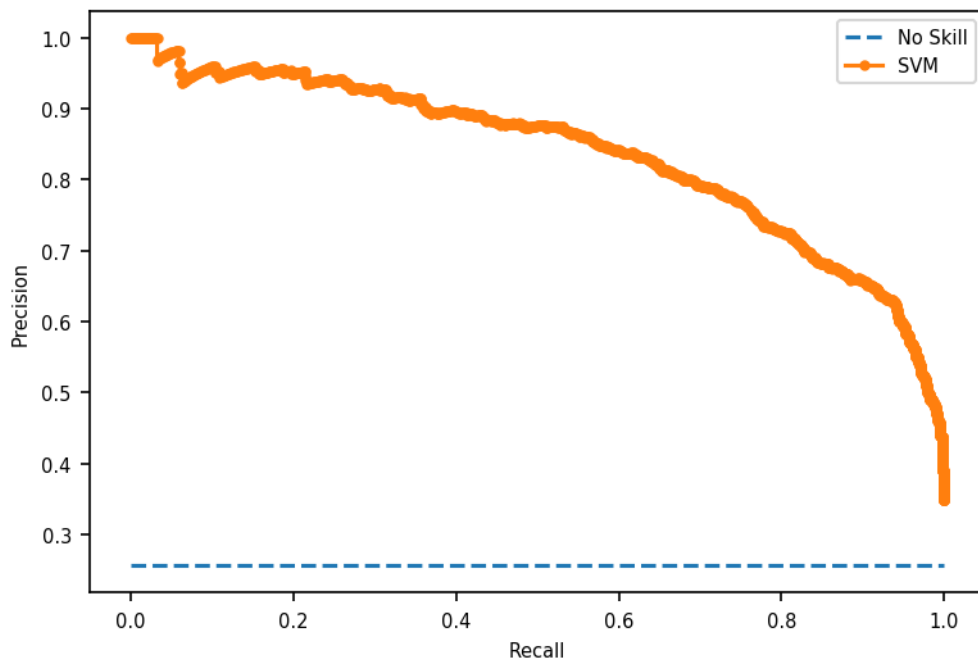

By lowering the threshold to 0.35, mean precision was still at 70%, while recall rose to 84%. Crucially, when we ran a topic model on this group of documents and calculated which topics gained most documents by this lower threshold, we found that this affected especially adaptation and vulnerability-related topics, which seemed crucial to include, given the projects' goals. The document set with the lower inclusion threshold was therefore chosen as the final dataset.

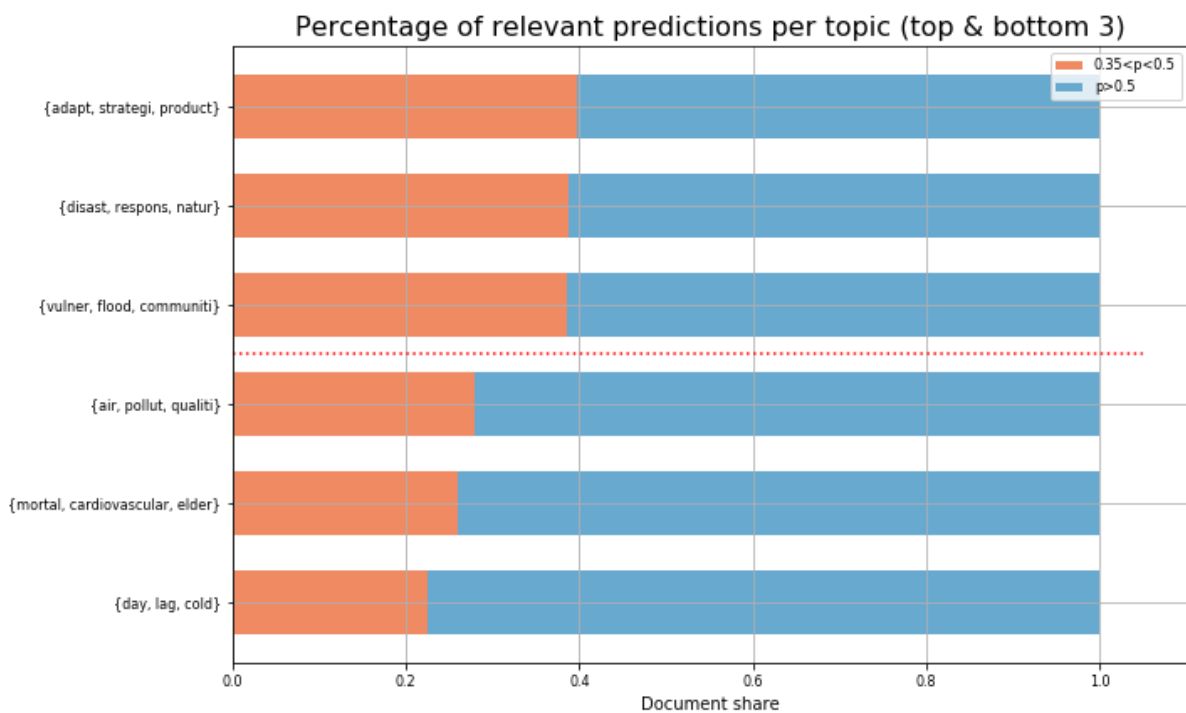

## 2 Unsupervised learning

For topic modelling, we ran two different algorithms with a variety of parameters: Latent Dirichlet Allocation (LDA) and Non-negative Matrix Factorization (NMF). For both, we use implementations provided by Scikit-learn. In an initial run, we tried both algorithms for 40-80 topics in intervals of 5 topics. For NMF, the alpha parameter (regularization term) was set at 0.01, while for LDA, alpha (concentration parameter of Dirichlet distribution, also called theta) was set at  $k/50$ , where  $k$  is the number of topics. The latter is taken from (Griffiths and Steyvers, 2004).

Investigation of the resulting topic models showed that NMF was consistently better at separating health topics from climate topics – LDA appeared to struggle to find health topics especially. We therefore ran additional NMFs with increasing alpha (0.01, 0.05, 0.1, 0.5 and 1). Results appeared to be relatively robust to changes in this parameter, but an alpha of 0.1 provided a slightly cleaner separation of topics.

Moreover, the ideal number of topics appeared to likely be at the higher end of our initial range. We therefore compared an NMF with alpha set to 0.1 for 60-80 topics, again at intervals of 5 topics. 70 topics provided best balance between detail and interpretability and was therefore chosen as the final model.

GRIFFITHS, T. L. & STEYVERS, M. 2004. Finding scientific topics. *Proceedings of the National Academy of Sciences of the United States of America*, 101 Suppl 1, 5228-5235.



**List of topics from the topic model, and associated categorisations, as well as keywords dominant within each topic.** Topic prevalence is a ratio reflecting how often each topic occurs relative to the average topic (>1 more prevalent than average; <1 less prevalent).

| Aggregated meta-topic           | Aggregated topic                 | Topic name                       | Top 3 stemmed keywords            | Topic prevalence |
|---------------------------------|----------------------------------|----------------------------------|-----------------------------------|------------------|
| Climate hazards                 | Drought                          | Wildfires                        | fire, wildfir, smoke              | 0.96             |
|                                 |                                  | Dust storms                      | dust, storm, desert               | 0.85             |
|                                 | Extreme precipitation & flooding | Drought                          | drought, impact, veget            | 0.81             |
|                                 |                                  | Extreme weather events           | extrem, event, weather            | 1.71             |
|                                 |                                  | Floods                           | flood, damag, river               | 1.43             |
|                                 |                                  | Hurricanes                       | hurrican, evacu, sandi            | 1.21             |
|                                 | General climate change           | General climate change           | climat, chang, impact             | 2.86             |
|                                 | General seasonality & weather    | Meteorological variables         | meteorolog, humid, correl         | 2.16             |
|                                 |                                  | Seasonality                      | season, winter, summer            | 2.09             |
|                                 | Heat                             | Ambient temperature              | temperatur, effect, ambient       | 2.33             |
|                                 |                                  | Increasing temperatures          | degre, increas, temperatur        | 1.35             |
|                                 |                                  | Heatwaves                        | heatwav, definit, dure            | 1.22             |
|                                 |                                  | Cold & extreme temperatures      | cold, spell, hot                  | 1.07             |
|                                 |                                  | Diurnal temperature range        | dtr, diurnal, effect              | 0.40             |
|                                 | Precipitation variability        | Monthly rainfall                 | month, rainfal, period            | 1.80             |
|                                 | Emissions                        | Particulate matter               | particulatematt, particul, matter | 2.14             |
| Particulate concentration (air) |                                  | concentr, particl, site          | 1.99                              |                  |
| Emissions (Nox & vehicles)      |                                  | emiss, nox, vehicl               | 1.90                              |                  |
| Emissions (ozone)               |                                  | ozon, concentr, ppb              | 0.92                              |                  |
| PAH                             |                                  | pah, sourc, combust              | 0.78                              |                  |
| Health risks & impacts          | All-cause mortality              | Death                            | death, caus, excess               | 1.45             |
|                                 |                                  | Mortality                        | mortal, cardiovascular, allcaus   | 2.05             |
|                                 | Chronic                          | Heat stress                      | heat, stress, heatrel             | 1.65             |
|                                 |                                  | Thermal stress & comfort         | thermal, stress, comfort          | 1.09             |
|                                 | Food & nutrition                 | Stroke                           | stroke, ischem, hemorrhag         | 0.62             |
|                                 |                                  | Farmers & agriculture            | farmer, crop, agricultur          | 1.13             |
|                                 | Patients & health systems        | Food insecurity                  | food, insecur, secur              | 0.93             |
|                                 |                                  | Public health                    | health, public, review            | 2.79             |
|                                 | Infectious                       | Hospital admissions              | hospit, admiss, respiratori       | 1.40             |
|                                 |                                  | Patients                         | patient, acut, medic              | 1.34             |
|                                 |                                  | Visits to health care facilities | visit, emerg, outpati             | 1.02             |
|                                 |                                  | Infectious diseases general      | diseas, infecti, respiratori      | 1.98             |
|                                 |                                  | Viral diseases                   | transmiss, outbreak, virus        | 1.54             |
|                                 |                                  | Mosquito vector dynamics         | mosquito, vector, abund           | 1.45             |
|                                 |                                  | Malaria                          | malaria, transmiss, falciparum    | 1.44             |
|                                 |                                  | Dengue                           | dengue, fever, outbreak           | 1.43             |
|                                 |                                  | Influenza                        | influenza, epidem, week           | 0.76             |
|                                 |                                  | HFMD                             | hfmd, foot, mouth                 | 0.58             |
|                                 | Maternal & child health          | Leptospirosis                    | leptospirosi, leptospira, human   | 0.52             |
|                                 |                                  | Cholera                          | cholera, outbreak, epidem         | 0.51             |
|                                 | Mental health                    | Child health                     | children, child, age              | 1.27             |
|                                 |                                  | Birth & pregnancy                | birth, preterm, pregnanc          | 0.91             |
|                                 | Occupational health & injury     | Mental health & PTSD             | mental, ptsd, disord              | 1.07             |
|                                 |                                  | Suicide                          | suicid, associ, rate              | 0.51             |
|                                 | Respiratory                      | Occupational injury              | injuri, worker, occup             | 1.00             |
|                                 |                                  | Air pollution                    | pollut, air, qualiti              | 2.42             |
|                                 |                                  | Respiratory viruses              | infect, rsv, respiratori          | 1.20             |
|                                 |                                  | Pollen & allergies               | pollen, allergen, airborne        | 0.82             |
|                                 |                                  | Asthma                           | asthma, childhood, exacerb        | 0.75             |
|                                 |                                  | Fungal spores                    | spore, fungal, airborne           | 0.54             |
| WASH                            | Drinking water quality           | water, drink, sourc              | 1.32                              |                  |
| Options & responses             | Developing community resilience  | Community resilience             | communiti, resili, social         | 1.63             |
|                                 | Disaster risk reduction          | Disaster risk reduction          | disast, natur, prepared           | 1.53             |
|                                 | Mitigation co-benefits           | Energy policy & co-benefits      | energi, cost, polici              | 1.82             |
|                                 |                                  | Greenhouse pathways              | scenario, project, rcp            | 1.46             |
| Policy & practice               | Adaptation                       | adapt, strategi, plan            | 1.55                              |                  |
| Mediating pathways              | Demographic vulnerability        | Age & Sex                        | age, preval, group                | 2.17             |
|                                 | Geographic exposure              | Urban areas                      | urban, citi, uhi                  | 1.86             |
|                                 |                                  | China                            | china, provinc, haze              | 1.35             |
|                                 |                                  | Rural households                 | household, stove, rural           | 1.33             |
|                                 |                                  | Building design                  | indoor, outdoor, home             | 0.99             |
| Social vulnerability            | Vulnerability                    | vulner, social, hazard           | 1.57                              |                  |
| Other                           | Methods & mixed                  | Spatial analyses                 | spatial, area, region             | 2.40             |
|                                 |                                  | Modeling & forecasting           | model, predict, forecast          | 2.37             |
|                                 |                                  | Risk assessment & risk perc      | risk, factor, percept             | 2.20             |
|                                 |                                  | Exposure                         | exposur, associ, estim            | 1.94             |
|                                 |                                  | Case data                        | case, report, number              | 1.89             |
|                                 |                                  | Temporal analyses                | day, lag, associ                  | 1.87             |
|                                 |                                  | Disease incidence                | incid, rate, provinc              | 1.65             |
| Symptoms                        | symptom, depress, associ         | 0.92                             |                                   |                  |
